# Supplementary material for: Chronic n-3 fatty acid intake enhances insulin response to oral glucose and elevates GLP-1 in high-fat diet-fed obese mice
Source: Royal Society of Chemistry journal article supplement (doi:10.1039/d0fo01942a), 2020-01-01
Supplement: d0fo01942a1.pdf [file d0fo01942a1.pdf]

## Supplementary materials

**Supplementary Table 1.** Composition of macronutrients in experimental diets

|                                        | <b>Chow</b> | <b>cHF</b> | <b>cHF+F</b> |
|----------------------------------------|-------------|------------|--------------|
| Macronutrient composition <sup>a</sup> |             |            |              |
| Dry matter (g/100 g)                   | 90.9        | 94.8       | 95.4         |
| Ash (g/100 g)                          | 6.8         | 4.1        | 4.0          |
| Lipids (g/100 g)                       | 2.9         | 31.8       | 32.4         |
| Carbohydrates (g/100 g)                | 64.3        | 47.2       | 47.6         |
| Proteins (g/100 g)                     | 16.9        | 11.7       | 11.4         |
| Supplement <sup>b</sup>                |             |            |              |
| Epax 1050 TG (g/100 g)                 | 0.0         | 0.0        | 5.3          |

<sup>a</sup>The macronutrient composition of experimental diets was assessed by drying (Dry matter), gravimetry (Ash), Kjeldahl method (Proteins), and the extraction after acid hydrolysis (Lipids), while the concentration of carbohydrates was calculated. In case of the cHF and cHF+F diet, some of the results differ from the data published previously (see ref. [27] of the main article), which were based solely on calculations and partially reflected a different composition of infant milk product that is used for the preparation of these diets.

<sup>b</sup>An equivalent part of the major lipid source in the cHF+F diet (i.e. corn oil) was replaced by the EPA+DHA concentrate “Epax 1050 TG” (Epax, Ålesund, Norway).
